# Supplementary figures and images for: Análisis estadístico aplicado: problemas y soluciones mediante aplicaciones informáticas
Source: Royal Society of Chemistry journal article supplement (doi:10.1039/c9nr08364b), 1998-01-01

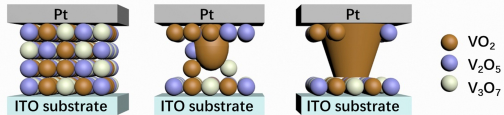

Supplement: c9nr08364b3.pdf [file c9nr08364b3.pdf]
